# Supplementary material
Source: Springer Nature journal article supplement (https://www.springermedizin.de/resource/supplementary/12931_2013_1450_MOESM1_ESM.pdf/9426218)

**A**

connection to  
expiratory limb

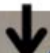

connection  
to ETT

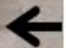

**B**

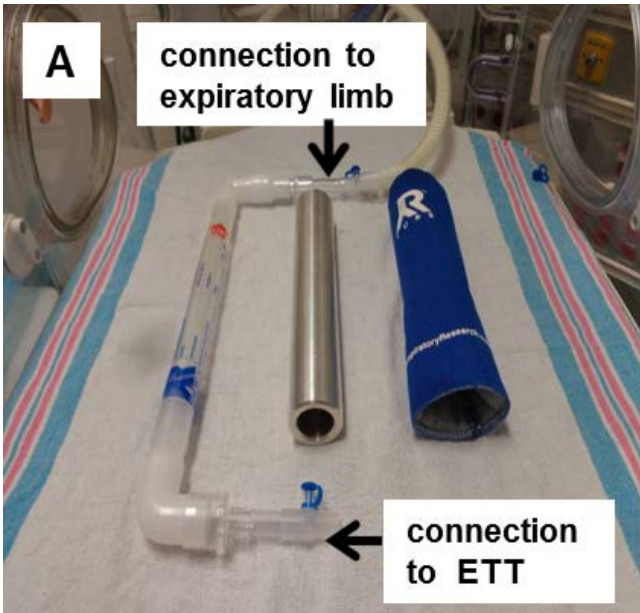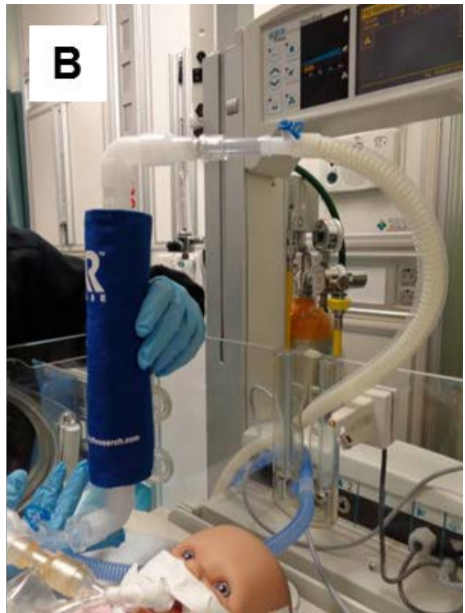

Supplement: MOESM1 [file 9426218]
